# Supplementary material for: Are disease reservoirs special? Taxonomic and life history characteristics
Source: PubMed Central journal article supplement (PMC5509157; doi:10.1371/journal.pone.0180716), 2017-07-13
Supplement: pone.0180716.s004.pdf [file pone.0180716.s004.pdf]

## **S2 Text. Criteria used to assign confidence levels to reservoir identities.**

**None:** Reservoir is implicated, but no diagnostic evidence was available.

**Low:** Only evidence of natural infection (antibodies, PCR, culture, microscopy) in populations connected to target.

**Medium:** Direct observation of natural infection in host (visual, PCR, culture or microscopy), plus one additional piece of evidence for **High**.

**High:** Medium criteria plus empirical evidence that logically supports both that

- A) this population or community is the source of most infections of target hosts, and
- B) the parasite would be driven extinct with the loss of this population or community.

The evidence for this could come from a wide range of studies, including:

- Experimental infection (i.e. confirmation of susceptibility)
- Confirmed infectiousness in experimental or natural setting
- Changes in reservoir abundance precede and are mimicked by changes in disease incidence (e.g. risk factor analysis)
- Direct measurement of (A), e.g. blood meal analysis of collected vectors, other epidemiological studies of outbreaks
- Elimination of all other possible reservoirs through above studies
