# Supplementary material for: Are disease reservoirs special? Taxonomic and life history characteristics
Source: PubMed Central journal article supplement (PMC5509157; doi:10.1371/journal.pone.0180716), 2017-07-13
Supplement: pone.0180716.s006.pdf [file pone.0180716.s006.pdf]

**S1 Table. Geographical distribution of disease systems.**

| Region        | All Systems<br>(n = 330) | Epidemic Potential Zone* |                           |                            | Human Target<br>(261) | High Priority Zoonotic Pathogens† |              |
|---------------|--------------------------|--------------------------|---------------------------|----------------------------|-----------------------|-----------------------------------|--------------|
|               |                          | Dead-End<br>(220)        | Stuttering<br>Chains (44) | Epidemic<br>Potential (66) |                       | Top 25%<br>(109)                  | Top 10% (45) |
| North America | 54.24% (179)             | 58.64% (129)             | 54.55% (24)               | 39.39% (26)                | 54.79% (143)          | 58.72% (64)                       | 57.78% (26)  |
| South America | 42.73% (141)             | 45.45% (100)             | 45.45% (20)               | 31.82% (21)                | 44.44% (116)          | 39.45% (43)                       | 33.33% (15)  |
| Africa        | 46.06% (152)             | 42.73% (94)              | 59.09% (26)               | 48.48% (32)                | 44.83% (117)          | 47.71% (52)                       | 48.89% (22)  |
| Oceania       | 33.33% (110)             | 35.91% (79)              | 36.36% (16)               | 22.73% (15)                | 34.87% (91)           | 37.61% (41)                       | 28.89% (13)  |
| Europe        | 46.36% (153)             | 48.64% (107)             | 43.18% (19)               | 40.91% (27)                | 45.59% (119)          | 44.95% (49)                       | 35.56% (16)  |
| Asia          | 53.94% (178)             | 57.73% (127)             | 54.55% (24)               | 40.91% (27)                | 59.77% (156)          | 58.72% (64)                       | 55.56% (25)  |

Data show the percentage of disease systems found on each continent. In addition to the pathogen being endemic on a continent, the reservoir and target were also required to occur. Many systems (n = 99) were classified as worldwide and are thus classified as being present on each of the listed continents. The number of systems is given in parentheses.

\*The epidemic potential zone subsets represent the transmission potential of the pathogen in the target host population(s) following spillover. The zones are defined as follows: dead-end for a basic reproductive number ( $R_0$ ) nearly equal to zero, stuttering chains for an  $R_0$  greater than zero but less than one, and epidemic potential for an  $R_0$  greater than one.

†High priority zoonotic pathogen subsets were determined by estimating the pathogen's representation in the scientific literature using the H-index. Each subset was created to include pathogens that are among the 25% (Top 25%) and 10% (Top 10%) most significant human pathogens known.
