# Supplementary material for: Are disease reservoirs special? Taxonomic and life history characteristics
Source: PubMed Central journal article supplement (PMC5509157; doi:10.1371/journal.pone.0180716), 2017-07-13
Supplement: pone.0180716.s007.pdf [file pone.0180716.s007.pdf]

**S2 Table. Summary of transmission types found in all disease systems and subsets.**

| Transmission Type | All Systems (n = 330) | Epidemic Potential Zone* |                        |                         | Human Target (261) | High Priority Zoonotic Pathogens† |              |
|-------------------|-----------------------|--------------------------|------------------------|-------------------------|--------------------|-----------------------------------|--------------|
|                   |                       | Dead-End (220)           | Stuttering Chains (44) | Epidemic Potential (66) |                    | Top 25% (109)                     | Top 10% (45) |
| Direct Contact    | 41.52% (137)          | 33.18% (73)              | 54.55% (24)            | 60.61% (40)             | 36.78% (96)        | 37.61% (41)                       | 53.33% (24)  |
| Indirect Contact  | 15.45% (51)           | 15.00% (33)              | 11.36% (5)             | 19.70% (13)             | 13.03% (34)        | 14.68% (16)                       | 8.89% (4)    |
| Vector-Borne      | 37.88% (125)          | 36.82% (81)              | 40.91% (18)            | 39.39% (26)             | 39.46% (103)       | 44.04% (48)                       | 44.44% (20)  |
| Trophic           | 27.88% (92)           | 32.73% (71)              | 27.27% (12)            | 12.12% (8)              | 30.27% (79)        | 27.52% (30)                       | 24.44% (11)  |

Data show the percentage of systems with each type of transmission between the reservoir and the target. A single system may be categorized as showing more than one transmission type. Trophic transmission included both food- and water-borne transmission. Vector-borne is limited to transmission by arthropods. The number of systems is given in parentheses.

\*The epidemic potential zone subsets represent the transmission potential of the pathogen in the target host population(s) following spillover. The zones are defined as follows: dead-end for a basic reproductive number ( $R_0$ ) nearly equal to zero, stuttering chains for an  $R_0$  greater than zero but less than one, and epidemic potential for an  $R_0$  greater than one.

†High priority zoonotic pathogen subsets were determined by estimating the pathogen's representation in the scientific literature using the H-index. Each subset was created to include pathogens that are among the 25% (Top 25%) and 10% (Top 10%) most significant human pathogens.
