# Supplementary material for: Are disease reservoirs special? Taxonomic and life history characteristics
Source: PubMed Central journal article supplement (PMC5509157; doi:10.1371/journal.pone.0180716), 2017-07-13
Supplement: pone.0180716.s008.pdf [file pone.0180716.s008.pdf]

**S3 Table. Observed representation of mammalian orders among reservoirs versus expected.**

| Order            | Total Species* | Expected | Observed | Residual | Standardized Residual |
|------------------|----------------|----------|----------|----------|-----------------------|
| Afrosoricida     | 51             | 1.68     | 0        | -1.68    | -1.29                 |
| Artiodactyla     | 240            | 7.89     | 24       | 16.11    | 5.74                  |
| Carnivora        | 286            | 9.40     | 26       | 16.60    | 5.41                  |
| Cetacea          | 84             | 2.76     | 0        | -2.76    | -1.66                 |
| Chiroptera       | 1116           | 36.68    | 19       | -17.68   | -2.92                 |
| Cingulata        | 21             | 0.69     | 1        | 0.31     | 0.37                  |
| Dasyuromorphia   | 71             | 2.33     | 0        | -2.33    | -1.53                 |
| Dermoptera       | 2              | 0.07     | 0        | -0.07    | -0.26                 |
| Didelphimorphia  | 87             | 2.86     | 3        | 0.14     | 0.08                  |
| Diprotodontia    | 143            | 4.70     | 3        | -1.70    | -0.78                 |
| Erinaceomorpha   | 24             | 0.79     | 3        | 2.21     | 2.49                  |
| Hyracoidea       | 4              | 0.13     | 2        | 1.87     | 5.15                  |
| Lagomorpha       | 92             | 3.02     | 8        | 4.98     | 2.86                  |
| Macroscelidea    | 15             | 0.49     | 0        | -0.49    | -0.70                 |
| Microbiotheria   | 1              | 0.03     | 0        | -0.03    | -0.18                 |
| Monotremata      | 5              | 0.16     | 0        | -0.16    | -0.41                 |
| Notoryctemorphia | 2              | 0.07     | 0        | -0.07    | -0.26                 |
| Paucituberculata | 6              | 0.20     | 0        | -0.20    | -0.44                 |
| Peramelemorphia  | 21             | 0.69     | 0        | -0.69    | -0.83                 |
| Perissodactyla   | 17             | 0.56     | 3        | 2.44     | 3.27                  |
| Pholidota        | 8              | 0.26     | 0        | -0.26    | -0.51                 |
| Pilosa           | 10             | 0.33     | 2        | 1.67     | 2.92                  |
| Primates         | 376            | 12.36    | 8        | -4.36    | -1.24                 |
| Proboscidea      | 3              | 0.10     | 0        | -0.10    | -0.31                 |
| Rodentia         | 2277           | 74.83    | 72       | -2.83    | -0.33                 |
| Scandentia       | 20             | 0.66     | 0        | -0.66    | -0.81                 |
| Sirenia          | 5              | 0.16     | 0        | -0.16    | -0.41                 |
| Soricomorpha     | 428            | 14.07    | 4        | -10.07   | -2.68                 |
| Tubulidentata    | 1              | 0.03     | 0        | -0.03    | -0.18                 |

The expected distribution represents the number of species in each order that would be identified as reservoirs if they were found as a reservoir host in the same proportions as they are all mammals. Observed numbers total to the 178 mammalian species identified as reservoir hosts. The residual is the absolute difference between expected species and observed species. Standardized residuals are calculated by dividing the residual by the square root of the expected number of species. Positive residuals represent more reservoir species than expected by chance. Negative residuals represent fewer reservoir species than expected by chance.

\*As listed by *Mammal Species of the World* [22].
