# Supplementary material for: Are disease reservoirs special? Taxonomic and life history characteristics
Source: PubMed Central journal article supplement (PMC5509157; doi:10.1371/journal.pone.0180716), 2017-07-13
Supplement: pone.0180716.s010.pdf [file pone.0180716.s010.pdf]

**S5 Table. Most represented mammal species among reservoirs.**

| Order          | Species                       | All Systems (n = 330)<br>Count | Human Target Only (n = 261)<br>Count |
|----------------|-------------------------------|--------------------------------|--------------------------------------|
| Carnivora      | <i>Canis lupus</i>            | 44                             | 39                                   |
| Carnivora      | <i>Felis catus</i>            | 37                             | 31                                   |
| Artiodactyla   | <i>Bos taurus</i>             | 32                             | 27                                   |
| Artiodactyla   | <i>Sus scrofa</i>             | 24                             | 21                                   |
| Artiodactyla   | <i>Ovis aries</i>             | 22                             | 16                                   |
| Rodentia       | <i>Rattus rattus</i>          | 18                             | 17                                   |
| Artiodactyla   | <i>Capra hircus</i>           | 16                             | 12                                   |
| Rodentia       | <i>Rattus norvegicus</i>      | 13                             | 12                                   |
| Carnivora      | <i>Vulpes vulpes</i>          | 9                              | 5                                    |
| Perissodactyla | <i>Equus caballus</i>         | 7                              | 7                                    |
| Rodentia       | <i>Mus musculus</i>           | 7                              | 7                                    |
| Artiodactyla   | <i>Odocoileus virginianus</i> | 7                              | 4                                    |
| Rodentia       | <i>Myodes glareolus</i>       | 6                              | 6                                    |
| Rodentia       | <i>Peromyscus leucopus</i>    | 6                              | 6                                    |
| Carnivora      | <i>Canis latrans</i>          | 5                              | 3                                    |
| Artiodactyla   | <i>Syncerus caffer</i>        | 5                              | 0                                    |
| Rodentia       | <i>Cuniculus paca</i>         | 4                              | 4                                    |
| Carnivora      | <i>Procyon lotor</i>          | 4                              | 4                                    |
| Rodentia       | <i>Rhombomys opimus</i>       | 4                              | 4                                    |
|                | Others                        | 157 ≤ 3                        | 134 ≤ 3                              |
